# Supplementary material for: Stabilization of fatty acid synthesis enzyme acetyl-CoA carboxylase 1 suppresses acute myeloid leukemia development
Source: JCI journal article supplement (doi:10.1172/jci141529), 2021-06-14
Supplement: sd1 [file 1]

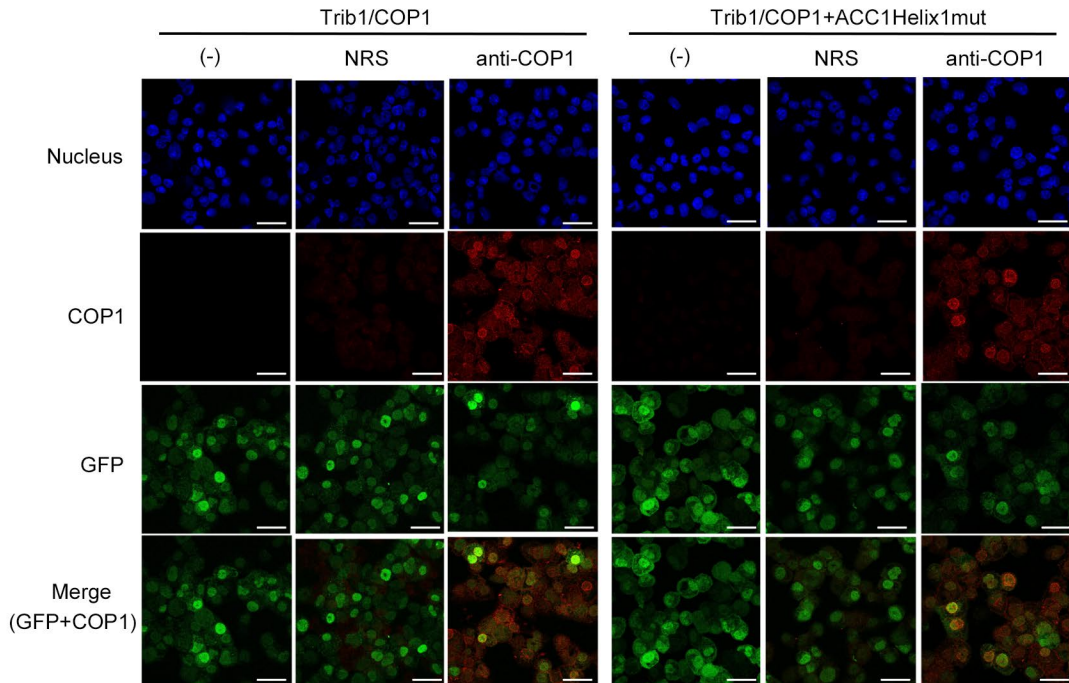

**Supplemental Figure 1.** Immunofluorescence staining of GFP-positive bone marrow (BM) cells infected with Trib1/COP1 or Trib1/COP1/ACC1 Helix1mut-retrovirus showing nucleus (blue), COP1 (red), and GFP (green). GFP-positive populations of BM cells were isolated by cell sorting and then analyzed for the experiment. Scale bars: 20  $\mu$ m. NRS, preimmune normal rabbit serum.

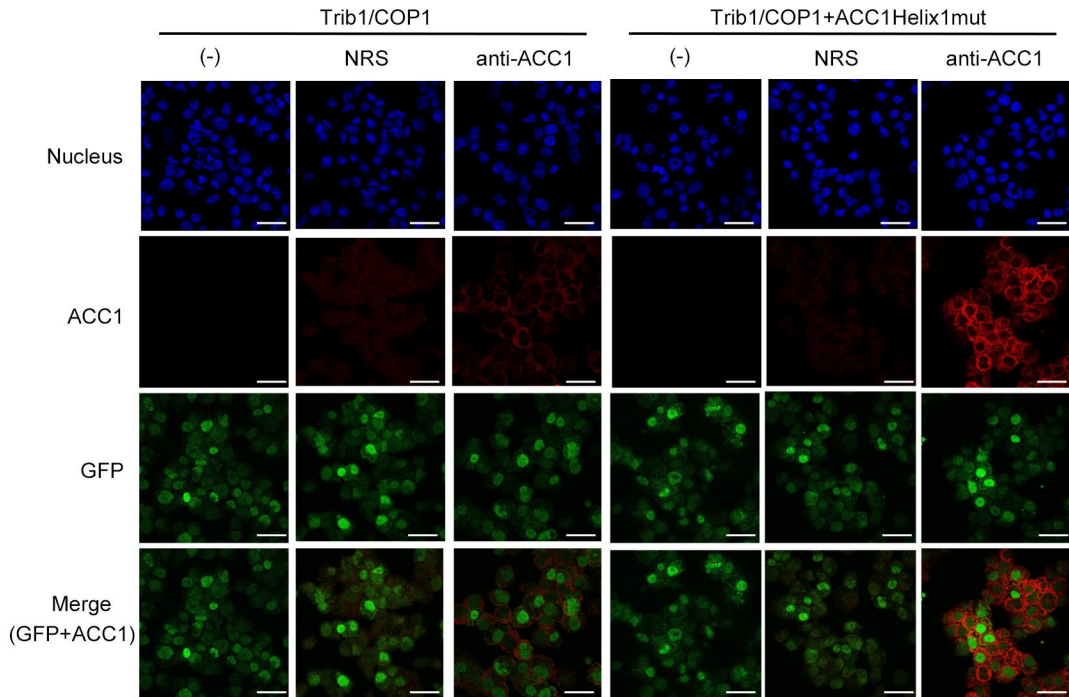

**Supplemental Figure 2.** Immunofluorescence staining of GFP-positive BM cells infected with Trib1/COP1 or Trib1/COP1/ACC1 Helix1mut-retrovirus showing nucleus (blue), ACC1 (red), and GFP (green). GFP-positive populations of BM cells were isolated by cell sorting and then analyzed for the experiment. Scale bars: 20  $\mu$ m. NRS, preimmune normal rabbit serum.
